# Supplementary material for: Deep learning-based pathway-centric approach to characterize recurrent hepatocellular carcinoma after liver transplantation
Source: PubMed Central journal article supplement (PMC11151487; doi:10.1186/s40246-024-00624-6), 2024-06-05
Supplement: 40246_2024_624_MOESM1_ESM.pdf [file 40246_2024_624_MOESM1_ESM.pdf]

# Supplementary Fig. 1

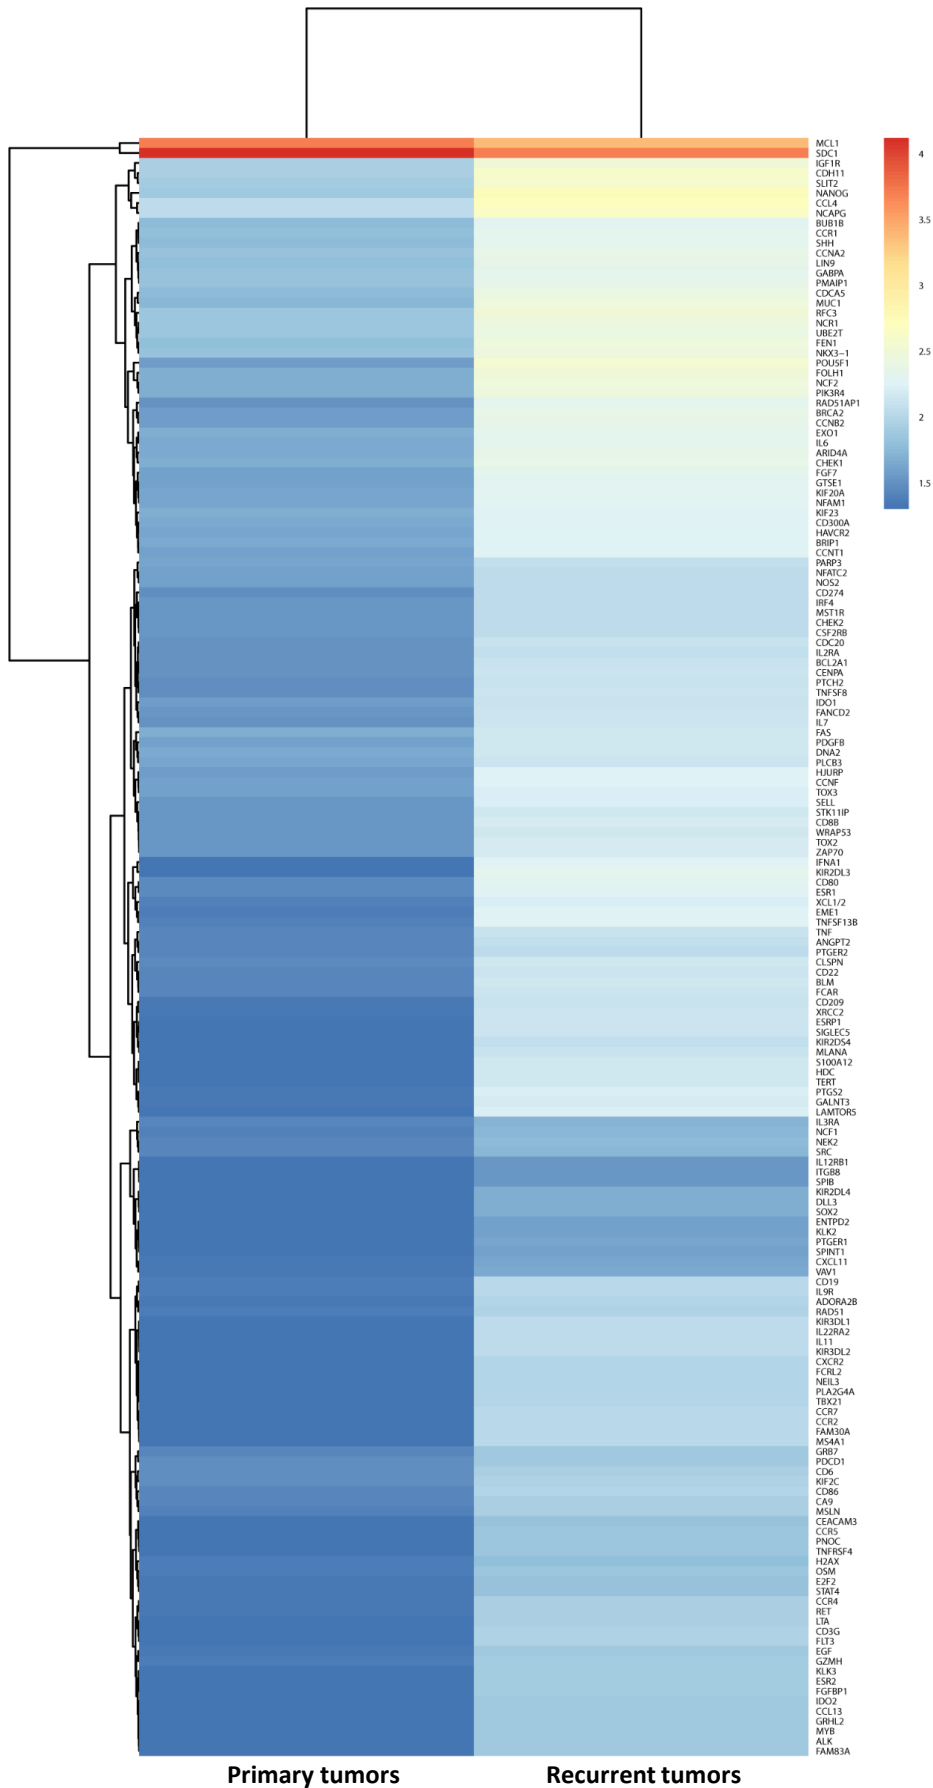

**Supplementary Figure 1. Differentially expressed genes (DEGs).** The heatmap shows the 162 DEGs of HCC recurrent post-transplant tumors compared with the paired primary tumors ( $q$ -value  $\leq 0.05$  and  $|\text{Fold change}| \geq 1.5$ ).

## Supplementary Fig. 2

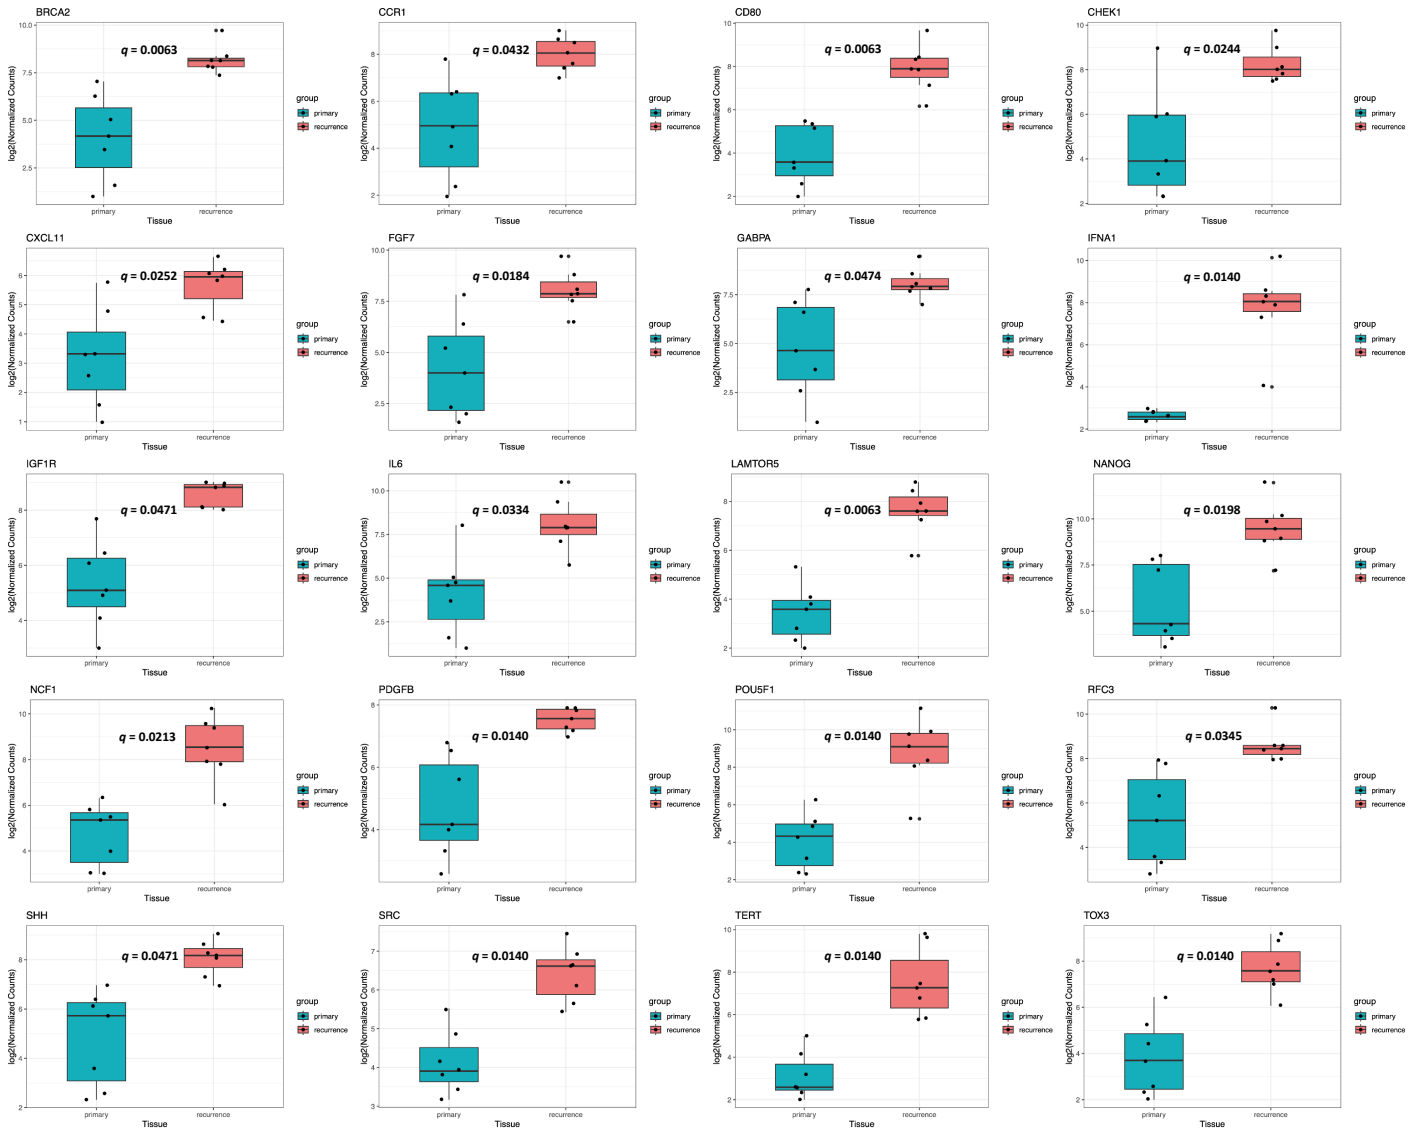

**Supplementary Figure 2. Identification of 20 genes for recurrent HCC post-transplant in a pathway-centric modeling machine learning-based analysis.**

### Supplementary Fig. 3

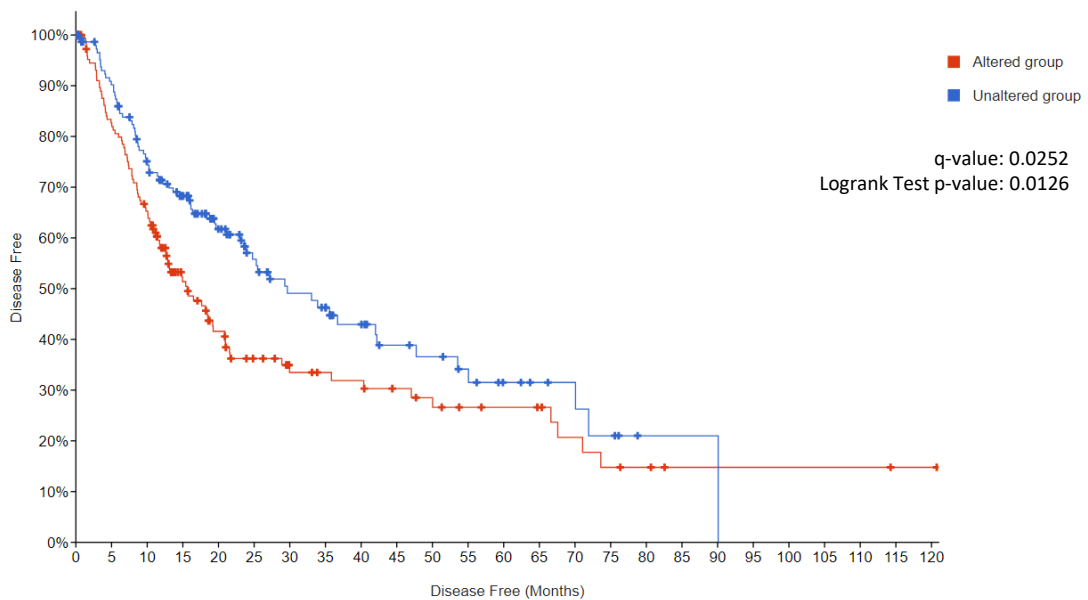

**Number at risk (n)**

|                 |     |     |     |    |    |    |    |    |    |    |    |    |    |    |   |   |   |   |   |   |   |   |   |   |
|-----------------|-----|-----|-----|----|----|----|----|----|----|----|----|----|----|----|---|---|---|---|---|---|---|---|---|---|
| Altered group   | 157 | 119 | 93  | 55 | 40 | 30 | 23 | 21 | 20 | 17 | 15 | 12 | 11 | 10 | 7 | 5 | 4 | 2 | 2 | 2 | 2 | 2 | 1 | 1 |
| Unaltered group | 151 | 128 | 101 | 83 | 59 | 44 | 35 | 32 | 24 | 18 | 16 | 13 | 9  | 7  | 6 | 4 | 1 | 1 | 1 | 0 | 0 | 0 | 0 | 0 |

| Survival plot summary | Number of cases, Total | Number of events | Median months disease free (95% CI) |
|-----------------------|------------------------|------------------|-------------------------------------|
| Altered group         | 157                    | 93               | 15.70 (12.61 - 20.93)               |
| Unaltered group       | 151                    | 73               | 29.66 (23.95 - 47.73)               |

**Supplementary Figure 3. Association between upregulation of 20-gene signatures and reduced disease-free survival in HCC patients.**
